# Supplementary material for: Removal Performances of Turbidity, Organics, and NH4+-N in a Modified Settling Tank with Rotating Biological Discs Used for Enhancing Drinking Water Purification
Source: MDPI journal article supplement (doi:10.3390/w14244066), 2022-12-13
Supplement: s1 [file s1]

## Supplementary Material

**Removal performances of turbidity, organics, and  $\text{NH}_4\text{-N}$  in a modified settling tank with rotating biological discs used for enhanced drinking water purification**

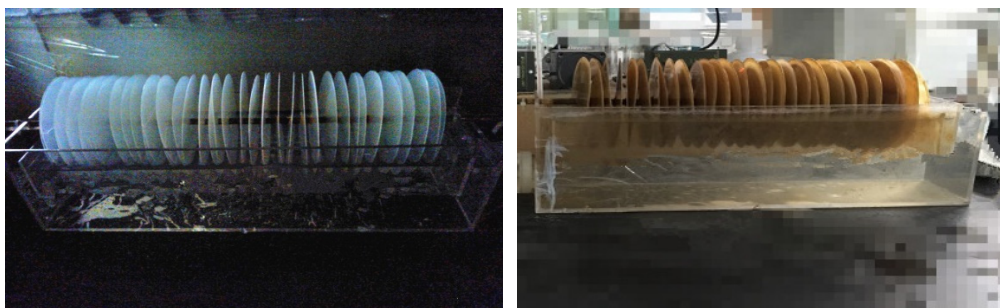

**Figure S1** Modified horizontal flow settling tank before and after experiments

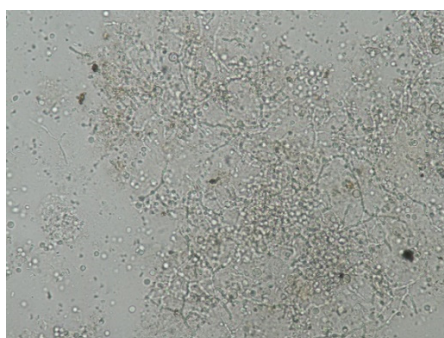

**Figure S2** The shape of mature biofilm observed by an optical microscope

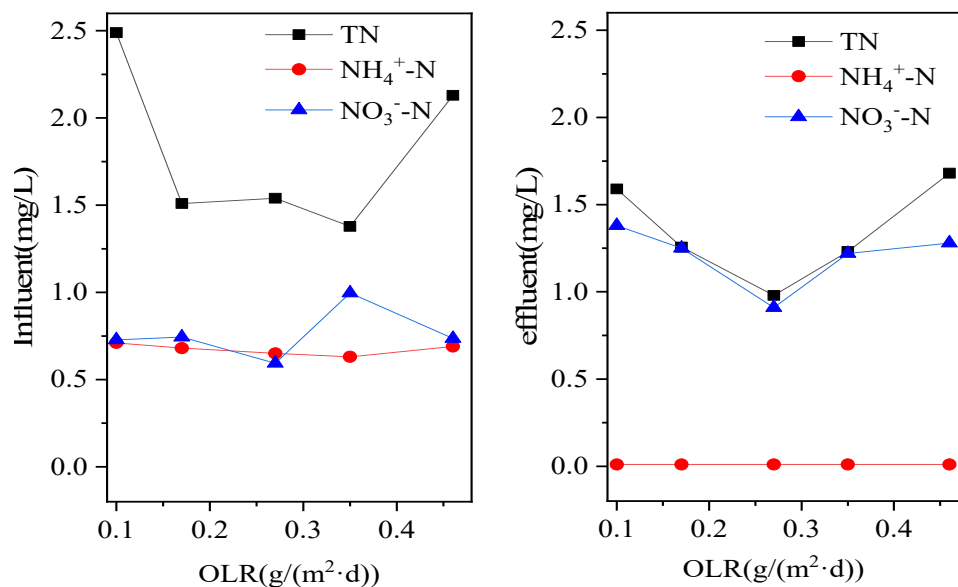

**Figure S3** Variation of TN,  $\text{NH}_4^+\text{-N}$  and  $\text{NO}_3^-\text{-N}$  in influent(a) and effluent(b) at different organic loading rates (HRT=2.0 h, disc rotating speed = 3.0 r/min).

**Table S1** Quality of the raw water sampled from Heihe reservoir

| Items                           | Variation range | Average value |
|---------------------------------|-----------------|---------------|
| pH                              | 7.1-7.5         | 7.3           |
| Turbidity (NTU)                 | 6.70-8.20       | 7.50          |
| TOC (mg/L)                      | 3.76-4.72       | 4.24          |
| $\text{NH}_4^+\text{-N}$ (mg/L) | 1.94-2.50       | 2.22          |
| TP (mg/L)                       | 0.11-0.24       | 0.18          |
| $\text{NO}_2^-\text{-N}$ (mg/L) | 0.02-0.03       | 0.025         |
| $\text{NO}_3^-\text{-N}$ (mg/L) | 0.59-1.00       | 0.80          |
